# Supplementary material for: Genomic analysis of mouse VL30 retrotransposons
Source: PubMed Central journal article supplement (PMC4859993; doi:10.1186/s13100-016-0066-8), 2016-05-06
Supplement: 13100_2016_66_MOESM5_ESM.pdf [file 13100_2016_66_MOESM5_ESM.pdf]

| <b>VL30 name</b> | <b>Gene name/Distance to TSS</b>               |
|------------------|------------------------------------------------|
| 1qA2             | Sntg1 (+62021)                                 |
| 1qA5             | Lmbrd1 (+388746), Bai3 (+812423)               |
| 1qC1.1           | Asnsd1 (-342063), Stk17b (+90453)              |
| 1qD              | Alpl2 (+11836), Dis3l2 (+374288)               |
| 2qA3             | Abi1 (+27853), Pdss1 (+116865)                 |
| 2qD-2            | Zfp804a (-62350)                               |
| 2qD              | Olfr1033 (+335)                                |
| 2qF1             | Tgm3 (-63127), Stk35 (+148730)                 |
| 2qH4             | Gm14420 (-211075), AK078446 (-47223)           |
| 3qC              | NONE                                           |
| 3qE2             | Otol1 (-83575), 1110032A04Rik (-64142)         |
| 4qA1             | Car8 (-156331), Rab2a (-140272)                |
| 4qA1-2           | Rbm12b (-4469)                                 |
| 4qA3             | Manea (-702032)                                |
| 4qB3             | Mup5 (-62217), Mup20 (+156720)                 |
| 4qC3             | 4930473A06Rik (+13866)                         |
| 4qE1             | Gm13051 (-45787), RP23-282C23.3 (+52398)       |
| 4qE1-2           | Gm13235 (-32771), Zfp600 (+189055)             |
| 4qE2             | Ube4b (-9958), Rbp7 (+18379)                   |
| 5qA3             | Magi2 (-568586), Gnai1 (-298047)               |
| 5qE3             | Gm6205 (-129549), AA792892 (+141458)           |
| 5qG2             | Ccl24 (-53262), Rhbdd2 (-6349)                 |
| 6qA2             | Naa38 (-3143)                                  |
| 6qB1             | H4 (-28068), TCR-beta chain (+20882)           |
| 6qG2             | Gm6614 (-161345), Slco1a6 (+16059)             |
| 6qG3             | Tmtc1 (-193333), Ipo8 (+193782)                |
| 7qA1             | Vmn2r52 (-73798), Vmn1r66 (+25267)             |
| 7qA1-2           | Zscan4d (+24980), Zscan4c (+135423)            |
| 7qA3             | Vmn1r109 (+13803), Vmn1r159 (+68105)           |
| 7qA3-2           | Eid2 (-8861), Dyrk1b (+79537)                  |
| 7qB4             | Mrgprb3 (-97462), Zdhhc13 (-47740)             |
| 7qF3             | 4933402N03Rik (-17158), 5430419D17Rik (-10961) |
| 8qA4             | Gtf2e2 (-15672), Gsr (+63004)                  |
| 8qA4-2           | Msr1 (+150541), Tusc3 (+508570)                |
| 8qB33            | Ap1m1 (-3642)                                  |

|           |                                           |
|-----------|-------------------------------------------|
| 8qC3      | Zfp791 (-16620), Gm6531 (-12209)          |
| 8qD3      | Tmco7 (-4073)                             |
| 9qA5-2    | Gm5617 (+25888), Nnmt (+83844)            |
| 9qE31     | Tbc1d2b (-266264), Zic1 (+828766)         |
| XqA3-1-2  | Gm14351 (-253364), Gm2799 (-51916)        |
| XqA3-1    | Gm2933 (-141676), Gm14374 (+112580)       |
| XqA7-1    | Slitrk2 (-698101), Ctag2 (+903573)        |
| XqE3      | Vmn2r121 (-146875)                        |
| XqE3-2    | Vmn2r121 (-816915)                        |
| XqF2      | Dcx (-342862), Alg13 (-41885)             |
| XqF3      | Alas2 (-59918), Tmem29 (-46362)           |
| YqA1      | NONE                                      |
| YqB       | NONE                                      |
| 10qC12    | D10Jhu81e (+46187), Icosl (+54213)        |
| 10qD1     | Ppfia2 (-311445), Ccdc59 (+317415)        |
| 10qD2-1   | Atxn7l3b (-742726)                        |
| 11qA1     | Ankrd36 (-14253), Ccdc117 (-13214)        |
| 11qC      | Dhx40 (-6409), Ypel2 (+179693)            |
| 12qA1-1   | Pum2 (-88731), Slc7a15 (-45983)           |
| 12qA1-2-2 | 5730507C01Rik (-641417), Hpcal1 (+182279) |
| 12qA1-2   | 5730507C01Rik (+604420)                   |
| 12qA1-3-2 | NONE                                      |
| 12qA1-3   | Gm4983 (+14194)                           |
| 12qC1     | Fbxo33 (-5398)                            |
| 12qD2-2   | Oog1 (-50760), Gm2022 (+10909)            |
| 12qD3     | Gm10436 (+18419), Oog1 (+208972)          |
| 12qF1     | Aspg (-87544), BC048943 (-38284)          |
| 13qA1     | Tbce (+16960), B3galnt2 (+67966)          |
| 13qA3-1   | Hist1h2bn (+11370), Hist1h1b (+15061)     |
| 13qA5     | Shc3 (-69417), Cks2 (-8731)               |
| 13qB1     | Nsd1 (-22938), Fgfr4 (+34026)             |
| 13qB3-7   | Gm3604 (+88879), Zfp808 (+164405)         |
| 13qB3-2   | Gm10324 (+271944), Zfp640 (+312837)       |
| 13qB3-3   | Zfp640 (-71404), Uqcrb (+135712)          |
| 13qB3-5   | Mtrr (+346485), BC048507 (+410239)        |
| 13qB3-6   | Mtrr (+283492), BC048507 (+473232)        |

|           |                                                                            |
|-----------|----------------------------------------------------------------------------|
| 13qD2-3   | Mrps30 (+332422), Hcn1<br>(+452510)                                        |
| 14qB      | Msmc (-24098), Oxnad1 (+32197)                                             |
| 15qE1-1   | A4galt (-18016), Arfgap3 (+80457)<br>Ndufa6 (-10978), Cyp2d2<br>(+14991)   |
| 15qE1     | Cxadr (-583266), Usp25<br>(+704356)                                        |
| 16qC3-1   | Vmn2r97 (-14266), Vmn2r96<br>(+318329)                                     |
| 17qA3-2   | Vmn2r103 (+119648), Vmn2r104<br>(+155194)                                  |
| 17qA3-2-2 | Pou5f1 (-25353), H2-Q10<br>(+10597)                                        |
| 17qB1     | Twsg1 (-66610), Ankrd12<br>(+59249)                                        |
| 17qE1-1   | Rab18 (-98722), 4921524L21Rik<br>(+62850)                                  |
| 18qA1     |                                                                            |
| 18qA1-2   | Rbbp8 (-12595), Gata6 (+751248)                                            |
| 18qA2     | Celf4 (-251607)                                                            |
| 18qE4     | Tmx3 (-672104), Dok6 (-68914)                                              |
| 19qA2     | BC021614 (-4581)                                                           |
| 19qA3     | Ighmbp2 (+56760)                                                           |
|           |                                                                            |
|           | Asnsd1 (-35506), Stk17b<br>(+397010)                                       |
| 1Qc1.1tr  |                                                                            |
| 1qE2.1tr  | Cdh19 (-162359), Dsel (+725187)                                            |
| 1qE6tr    | Cr2 (-166473)                                                              |
| 2qC3tr    | Hnrnpa3 (-18735), Mtx2 (+814712)<br>Cyp7b1 (-47568), Armc1<br>(+872159)    |
| 3qA1tr    |                                                                            |
| 3qA3tr    | NONE                                                                       |
| 3qE1tr    | Nmd3 (-68751), B3galnt1 (-54443)<br>Golm4 (+141030), Serpini1<br>(+258268) |
| 3qE3tr    |                                                                            |
| 4qB3tr    | Rad23b (+70667), Klf4 (+111766)                                            |
| 4qD21tr   | Dmap1 (-69523), Klf17 (+13918)<br>Krba1 (-160764), Zfp746 (-<br>148229)    |
| 6qB23tr   |                                                                            |
| 6qB3tr    | Snca (-62174), Mmrn1 (-53147)<br>Ceacam5 (-172706), Psg29<br>(+337069)     |
| 7qA2tr    |                                                                            |
| 7qB1tr    | Abpe (+458370)                                                             |
| 7qB1-2tr  | LOC545947 (+790358)                                                        |
| 7qCtr     | Ndn (-383974)                                                              |
| 7qE2tr    | Neu3 (+9192), Olfr521 (+52061)<br>Gvin1 (-403270), Gm1966<br>(+26035)      |
| 7qE2.2tr  |                                                                            |
| 8qE1tr    | Afg3l1 (-3684)                                                             |
| 9qA3tr    | Zfp809 (+2382), Zfp599 (+31810)                                            |

|                 |                                           |
|-----------------|-------------------------------------------|
| 9qDtr           | Hcrtr2 (-103766), Fam83b (+118499)        |
| XqF3-2tr        | Gm10439 (-275981), Ott (+230305)          |
| XqA11tr         | Cybb (-14367), Gm5132 (+88700)            |
| XqC1tr          | 4930415L06Rik (-158966)                   |
| XqE1tr          | Cpxcr1 (-621398), 4930524E20Rik (+919964) |
| XqF2tr          | Ott (+53785)                              |
| XqF2-2tr        | Ott (-720017), Ott (+375305)              |
| XqF2-3tr        | Ott (-553285), Ott (+542037)              |
| XqF3tr          | Ott (-150583), Ott (+944739)              |
| XqF3.2tr        | Gm10439 (-442883), Ott (+63403)           |
| XqF3-3tr        | Gm10439 (-93213), Ott (+413073)           |
| XqF3-4tr        | Gm15097 (-134158), Gm10439 (+55745)       |
| XqF3-5tr        | Gm5647 (-135860), Gm16390 (+175077)       |
| 10qD2tr         | Kcnc2 (+281269), Atxn7l3b (+376634)       |
| 10qD3tr         | Olfr824 (-17959), Olfr825 (+18310)        |
| 11qCtr          | Pex12 (+41962), Slfn3 (+65685)            |
| 12qD2tr         | Oog1 (-46004), Gm8300 (+42368)            |
| 13qB3tr         | Cts3 (-517722), Zfp808 (-42041)           |
| 13qB3.2tr       | BC048507 (+271424), Mtrr (+485300)        |
| 13qC3tr         | NONE                                      |
| 14qA3tr         | Ube2e2 (-498464), Gm5458 (+197204)        |
| 14qE23tr        | Trim52 (+349413)                          |
| 15qA1tr         | 2410089E03Rik (+109399), Nipbl (+165958)  |
| 16qB1tr         | 2310042E22Rik (+70696), Chrd (+350121)    |
| 16qC2tr         | Speer2 (+7940)                            |
| 17qA1tr         | Slc22a2 (+10891), Slc22a1 (+80758)        |
| 17qA32tr        | Zfp53 (-12824), Zfp51 (+25812)            |
| 18qA13tr        | Usp14 (-22955), Rock1 (+128688)           |
| 18qE1tr         | Txn1 (-8492), Wdr7 (-7844)                |
| RLTR1C-chr1-1   | Rgs13 (-41684), Rgs1 (+30048)             |
| RLTR1D-chr1-1   | Mrpl15 (-14622), Lypla1 (-7545)           |
| RLTR1D-chr1-2   | Pgap1 (-25839), Ankrd44 (+342866)         |
| RLTR6_Mm-chr1-1 | Scg2 (+187053), Kcne4 (+436088)           |
| RLTR1D-chr1-3   | Gin1 (+25745), Pam (+299708)              |
| RLTR1D-chr1-4   | NONE                                      |
| RLTR1D-chr1-5   | Serpinb11 (-42732), Serpinb3c (-41211)    |
| RLTR6_Mm-chr1-2 | Cdh19 (-808715), Dsel (+78831)            |

|                  |                                                                      |
|------------------|----------------------------------------------------------------------|
| RLTR1D-chr1-6    | NONE                                                                 |
| RLTR1D-chr1-7    | Cd55 (-10917), Zp3r (+155949)                                        |
| RLTR1D-chr1-8    | Fam5c (+692485)                                                      |
| RLTR6_Mm-chr1-3  | NONE                                                                 |
| RLTR1D-chr1-9    | Cacna1e (+125339), Glul (+700636)                                    |
| RLTR1D-chr1-10   | Dpt (-263198), Atp1b1 (-75179)<br>Pbx1 (+331881), Lmx1a (+410819)    |
| RLTR1D-chr1-11   | Pbx1 (-169048), Nuf2 (+930158)                                       |
| RLTR6_Mm-chr1-4  | Ufc1 (-20303), Dedd (-13860)                                         |
| RLTR6_Mm-chr1-5  | Lin9 (-66875), Parp1 (+5484)                                         |
| RLTR1D-chr1-12   | Moxd1 (-65213), Stx7 (+8987)                                         |
| RLTR1D-chr10-1   | L3mbtl3 (-363774), Arhgap18 (-33553)                                 |
| RLTR1D-chr10-2   |                                                                      |
| RLTR6_Mm-chr10-1 | Sult3a1 (-193972), Clvs2 (-39150)                                    |
| RLTR6_Mm-chr10-2 | Frk (+415961)                                                        |
| RLTR1C-chr10-1   | Gpr6 (-225081), Fig4 (+6576)                                         |
| RLTR6_Mm-chr10-3 | Msl3l2 (-200798)                                                     |
| RLTR1C-chr10-2   | Aifm2 (-14964), Tysnd1 (+10171)                                      |
| RLTR6_Mm-chr10-4 | Anks1b (-27988), Uhrf1bp1l (+100530)                                 |
| RLTR1C-chr10-3   | Btg1 (-550662), Eea1 (+125676)                                       |
| RLTR1D-chr10-3   | Syt1 (-302050), Nav3 (+687550)                                       |
| RLTR1D-chr10-4   | Cpm (-178260), Cpsf6 (-74267)                                        |
| RLTR6_Mm-chr11-1 | C1d (-22965), Wdr92 (+22760)                                         |
| RLTR1D-chr11-1   | Gapdh (+614437)                                                      |
| RLTR1D-chr11-2   | Dppa1 (-65535), Timd2 (+12295)<br>Dnahc9 (-240447), Shisa6 (+117128) |
| RLTR1D-chr11-3   |                                                                      |
| RLTR6_Mm-chr11-2 | Rpl23 (-2735)                                                        |
| RLTR1D-chr11-4   | Ptchd3 (+133225)<br>Rdh14 (+347220), Kcns3 (+412373)                 |
| RLTR1D-chr12-1   | 5730507C01Rik (-429395), Hpcal1 (+394301)                            |
| RLTR1C-chr12-1   |                                                                      |
| RLTR1C-chr12-2   | 5730507C01Rik (+182737)                                              |
| RLTR6_Mm-chr12-1 | 5730507C01Rik (+280393)                                              |
| RLTR1C-chr12-3   | 5730507C01Rik (+281906)                                              |
| RLTR6_Mm-chr12-2 | 5730507C01Rik (+307502)<br>Asap2 (-197686), Gm4983 (+298976)         |
| RLTR1D-chr12-2   |                                                                      |
| RLTR1C-chr12-4   | Ywhaq (-709628)                                                      |
| RLTR1C-chr12-6   | NONE                                                                 |

|                  |                                          |
|------------------|------------------------------------------|
| RLTR1C-chr12-5   | NONE                                     |
| RLTR1C-chr12-7   | Taf1b (-349488), Gm4983 (-51824)         |
| RLTR6_Mm-chr12-3 | Gm4983 (-259744), Taf1b (-141568)        |
| RLTR1D-chr12-3   | Foxg1 (-391846)                          |
| RLTR6_Mm-chr12-4 | Gm10436 (+90157), Oog1 (+137234)         |
| RLTR6_Mm-chr12-5 | Gm10436 (+82027), Oog1 (+145364)         |
| RLTR1D-chr12-4   | Dio2 (+143099)                           |
| RLTR1C-chr13-1   | Mrpl32 (-4663), Psm2 (+4458)             |
| RLTR6_Mm-chr13-1 | 5033411D12Rik (+8745)                    |
| RLTR6_Mm-chr13-2 | Vmn1r205 (+19652), Vmn1r203 (+49227)     |
| RLTR1D-chr13-1   | Gcm2 (-36980), Elovl2 (+73435)           |
| RLTR6_Mm-chr13-3 | BC048507 (+7484), Mtrr (+749240)         |
| RLTR6_Mm-chr13-4 | Ccnh (-150705), Tmem161b (+816476)       |
| RLTR1C-chr13-2   | Homer1 (-95352), Papd4 (-16860)          |
| RLTR6_Mm-chr13-5 | Arsb (-9260), Dmgdh (+87983)             |
| RLTR1D-chr13-2   | Ankdd1b (-3400)                          |
| RLTR1D-chr13-3   | Fam169a (-19945), 1700029F12Rik (-12980) |
| RLTR1D-chr13-4   | lpo11 (+23793)                           |
| RLTR1D-chr14-1   | 4930452B06Rik (-834936)                  |
| RLTR6_Mm-chr14-1 | Sntn (-72846), Synpr (+313250)           |
| RLTR1C-chr14-1   | Asb14 (-105574), Dnahc12 (+18001)        |
| RLTR6_Mm-chr14-2 | Opn4 (-57983), Wapal (-15803)            |
| RLTR6_Mm-chr14-3 | Ghitm (-982337)                          |
| RLTR1D-chr14-2   | 5730469M10Rik (-50155), Dydc2 (+5144)    |
| RLTR1D-chr14-3   | Siah3 (-42503), Zc3h13 (+129106)         |
| RLTR1D-chr14-4   | NONE                                     |
| RLTR6_Mm-chr14-4 | NONE                                     |
| RLTR6_Mm-chr14-5 | NONE                                     |
| RLTR1D-chr14-5   | 4921530L21Rik (-486451)                  |
| RLTR1D-chr14-6   | Klf12 (-475425), 1700110M21Rik (+574847) |
| RLTR1C-chr14-2   | Stk24 (-23187), Slc15a1 (+102837)        |
| RLTR1D-chr15-1   | Cdh10 (+571671)                          |
| RLTR1D-chr15-2   | Cdh18 (-273732), Gm5803 (-               |

|                  |                                         |
|------------------|-----------------------------------------|
|                  | 47747)                                  |
| RLTR6_Mm-chr15-1 | Dnahc5 (+776482)                        |
| RLTR1D-chr15-3   | Ctnnd2 (-671434)                        |
| RLTR1D-chr15-4   | Cyp2d34 (-54159), Cyp2d37-ps (+15433)   |
| RLTR6_Mm-chr16-1 | Rbfox1 (-727207)                        |
| RLTR1C-chr16-1   | Ube2v2 (-25518), Mcm4 (+17364)          |
| RLTR6_Mm-chr16-2 | 2510002D24Rik (+14323), Mrpl40 (+25734) |
| RLTR1D-chr16-1   | Al480653 (+81030), Fam43a (+400679)     |
| RLTR1D-chr16-2   | Tfrc (-71574), Zdhhc19 (+41041)         |
| RLTR1C-chr16-2   | Casr (-19122), Cd86 (+84821)            |
| RLTR1C-chr16-3   | Zbtb20 (-805346), Gap43 (-101287)       |
| RLTR1D-chr16-3   | Alcam (+197556), Cblb (+223892)         |
| RLTR6_Mm-chr16-3 | NONE                                    |
| RLTR6_Mm-chr16-4 | Krtap16-7 (-9191), Krtap6-2 (+7146)     |
| RLTR6_Mm-chr17-1 | Chd1 (-112011), Prdm9 (-29625)          |
| RLTR1C-chr17-1   | Rgmb (-901234), Zfp960 (-336283)        |
| RLTR6_Mm-chr17-3 | Zfp960 (-119120)                        |
| RLTR1D-chr17-1   | Vmn2r98 (-97500), Vmn2r97 (+41671)      |
| RLTR6_Mm-chr17-4 | Vmn2r106 (-37277), Vmn2r107 (-22718)    |
| RLTR6_Mm-chr17-5 | Zfp229 (+41122), Zfp820 (+70913)        |
| RLTR1D-chr17-2   | 4930539E08Rik (+25224), Pnpla1 (+31689) |
| RLTR1C-chr17-2   | Pknox1 (-30090), Ndufv3 (+14568)        |
| RLTR1C-chr17-3   | March2 (-12327), Rab11b (+29489)        |
| RLTR1D-chr17-3   | H2-M10.6 (-12158), H2-M10.5 (+27107)    |
| RLTR1D-chr17-4   | Pla2g7 (-42558), Mep1a (-23120)         |
| RLTR1C-chr17-4   | NONE                                    |
| RLTR6_Mm-chr17-2 | Fert2 (-370729), Fbxl17 (-24709)        |
| RLTR1D-chr17-5   | Ddx11 (+55660), 1110012J17Rik (+270570) |
| RLTR1D-chr17-6   | Kcnk12 (-107234), Msh6 (-69822)         |
| RLTR6_Mm-chr18-1 | Mpp7 (-236450), Wac (-5884)             |
| RLTR1D-chr18-1   | Thoc1 (-49359), Colec12 (+201173)       |
| RLTR1D-chr18-2   | Zfp191 (-50605), Ino80c (+50443)        |

|                  |                                                                        |
|------------------|------------------------------------------------------------------------|
| RLTR1D-chr18-3   | NONE                                                                   |
| RLTR6_Mm-chr18-2 | Wnt8a (+15039), Nme5 (+21739)                                          |
| RLTR1D-chr18-4   | Dtwd2 (+9134), Pol (+354868)<br>Myo5b (-24775), Ccdc11 (+134744)       |
| RLTR1D-chr18-5   |                                                                        |
| RLTR6_Mm-chr19-1 | Gstp2 (-3129)                                                          |
| RLTR6_Mm-chr19-2 | AB056442 (-123143), Gm5631 (+42812)                                    |
| RLTR6_Mm-chr19-3 | Foxd4 (-6916), Cbwd1 (+53391)                                          |
| RLTR1D-chr2-1    | Slc4a10 (-45909), Tbr1 (+196178)<br>Ttc30a1 (-323310), Pde11a (+33376) |
| RLTR6_Mm-chr2-1  | Zfp804a (-761417), Nup35 (+653429)                                     |
| RLTR1D-chr2-2    | Olfr1024 (+2997), Olfr1023 (+15253)                                    |
| RLTR1D-chr2-3    |                                                                        |
| RLTR1D-chr2-4    | Olfr1257 (-21094), Olfr48 (-14763)                                     |
| RLTR6_Mm-chr2-2  | Blvra (-48048), Ap4e1 (+13898)                                         |
| RLTR6_Mm-chr2-3  | Xrn2 (-122846), Plk1s1 (+34325)                                        |
| RLTR6_Mm-chr2-4  | a (+15736), Ahcy (+45191)                                              |
| RLTR6_Mm-chr2-5  | Mocs3 (+7391), Kcng1 (+31318)                                          |
| RLTR6_Mm-chr3-1  | Il7 (-841563), Stmn2 (-54537)                                          |
| RLTR1D-chr3-1    | Zbtb10 (-239942), Tpd52 (-46571)                                       |
| RLTR1C-chr3-1    | Lrrcc1 (-48913), Slc7a12 (+4176)<br>Cyp7b1 (-581148), Armc1 (+338579)  |
| RLTR6_Mm-chr3-2  |                                                                        |
| RLTR1D-chr3-2    | Hltf (+31700), Gyg (+65484)                                            |
| RLTR1C-chr3-2    | Gyg (-8631), Cpa3 (+78454)                                             |
| RLTR1C-chr3-3    | Fat4 (-349726), Ankrd50 (-52398)<br>Fat4 (-285996), Ankrd50 (-116128)  |
| RLTR1C-chr3-4    |                                                                        |
| RLTR6_Mm-chr3-3  | Pcdh10 (+857618)<br>Vmn2r2 (-63765), Vmn2r3 (+86172)                   |
| RLTR1D-chr3-3    | Kcnab1 (-25555), AK035994 (+134865)                                    |
| RLTR1D-chr3-4    |                                                                        |
| RLTR1C-chr3-5    | B3galnt1 (-99674), Nmd3 (-23520)                                       |
| RLTR1D-chr3-5    | Sis (+89910)<br>Tlr2 (-42669), D930015E06Rik (+155884)                 |
| RLTR1C-chr3-6    |                                                                        |
| RLTR1D-chr3-6    | Pglyrp4 (+248843)                                                      |
| RLTR1D-chr3-7    | Pglyrp3 (-53190)<br>Fcgr1 (-78772), BC107364 (+79677)                  |
| RLTR1D-chr3-8    |                                                                        |
| RLTR1D-chr3-9    | Prmt6 (-604701)<br>St6galnac5 (+22987), Pigk (+245120)                 |
| RLTR6_Mm-chr3-4  |                                                                        |
| RLTR1D-chr3-10   | Slc44a5 (+67009), Lhx8                                                 |

|                 |                                                                        |
|-----------------|------------------------------------------------------------------------|
|                 | (+290115)                                                              |
| RLTR1D-chr3-11  | Negr1 (-621265), Lrriq3 (+847095)                                      |
| RLTR6_Mm-chr4-1 | Mms22l (-646611)<br>Olfr275 (-141955),                                 |
| RLTR6_Mm-chr4-2 | 4930547C10Rik (+87170)<br>3110001D03Rik (+71543), Kdm4c<br>(+954864)   |
| RLTR1D-chr4-1   | NONE                                                                   |
| RLTR1D-chr4-2   | B020004J07Rik (-44484),<br>C130073F10Rik (+5283)                       |
| RLTR1D-chr4-3   | Pde4b (-105063), Gm12789<br>(+162839)                                  |
| RLTR1D-chr4-4   | 0610037L13Rik (+16053), Cpt2<br>(+17637)                               |
| RLTR1D-chr4-5   | Bend5 (-247019), Agbl4 (+770196)                                       |
| RLTR6_Mm-chr4-3 | Zmym4 (-34594), Sfpq (-18784)                                          |
| RLTR1D-chr4-6   | Zmym1 (-2767)                                                          |
| RLTR1C-chr4-1   | Fam54b (-3954)                                                         |
| RLTR1C-chr4-2   | Prdm2 (-32308), Pdpn (+54490)<br>Gm13101 (-8888), Pramef17<br>(+18531) |
| RLTR1D-chr4-7   | Gm13101 (-15015), Pramef17<br>(+12404)                                 |
| RLTR6_Mm-chr4-4 | 4921511H03Rik (-384555)<br>Abcb1b (-43599), Abcb1a<br>(+94456)         |
| RLTR6_Mm-chr4-5 | Galnt11 (+17764), Mll3 (+258126)                                       |
| RLTR6_Mm-chr5-1 | Gpr113 (-865)                                                          |
| RLTR6_Mm-chr5-2 | Ywhah (-64491), Depdc5 (+90604)                                        |
| RLTR6_Mm-chr5-3 | Mrfap1 (-2311)                                                         |
| RLTR6_Mm-chr5-4 | NONE                                                                   |
| RLTR6_Mm-chr5-5 | G6pd2 (+394976), Arap2<br>(+562358)                                    |
| RLTR1C-chr5-1   | Amtn (-29059), Prol1 (+29737)                                          |
| RLTR1D-chr5-1   | Gbp4 (-39979), Mpa2l (+114168)<br>Tmem119 (-12021), Selplg<br>(+18128) |
| RLTR1D-chr5-2   | Aldh2 (-19573), 9330129D05Rik<br>(+5541)                               |
| RLTR6_Mm-chr5-8 | Camkk2 (-2560)                                                         |
| RLTR1C-chr5-2   | Snx8 (-23756), Eif3b (-6302)<br>N4bp2l1 (-69485), N4bp2l2<br>(+1602)   |
| RLTR1D-chr5-3   | Hepacam2 (+256928)                                                     |
| RLTR6_Mm-chr5-9 | Tmem168 (-3944)                                                        |
| RLTR1D-chr5-4   | Mpp6 (-91337), Npy (+196175)                                           |
| RLTR1D-chr6-1   | Avl9 (-4915)<br>Vmn1r19 (+29361), Ppm1k<br>(+101601)                   |
| RLTR1C-chr6-1   | AW146020 (-432087)                                                     |
| RLTR6_Mm-chr6-1 |                                                                        |
| RLTR6_Mm-chr6-2 |                                                                        |
| RLTR1D-chr6-2   |                                                                        |
| RLTR1C-chr6-2   |                                                                        |

|                 |                                         |
|-----------------|-----------------------------------------|
| RLTR1D-chr6-3   | Klr1f (-39466), Clec2g (+72054)         |
| RLTR6_Mm-chr6-3 | Prh1 (-140998), Gm8882 (-64709)         |
| RLTR6_Mm-chr6-4 | Bicd1 (-48918), 2810474O19Rik (+50554)  |
| RLTR6_Mm-chr6-5 | Bicd1 (-17054), 2810474O19Rik (+82418)  |
| RLTR1D-chr7-1   | Aurkc (-3408)                           |
| RLTR1D-chr7-2   | Ceacam5 (-4916)                         |
| RLTR6_Mm-chr7-1 | Nlrp5 (-78167), Nlrp4e (+6538)          |
| RLTR6_Mm-chr7-2 | Zfp568 (-4304)                          |
| RLTR6_Mm-chr7-3 | Hmg1l1 (-125781), Vmn2r58 (-22274)      |
| RLTR1D-chr7-3   | Zfp936 (-116385), Gm9268 (+42405)       |
| RLTR6_Mm-chr7-4 | Luzp2 (-862493)                         |
| RLTR6_Mm-chr7-5 | Luzp2 (-414878)                         |
| RLTR1D-chr7-4   | Ndn (-862600)                           |
| RLTR6_Mm-chr7-6 | Olfr294 (+10810), Olfr295 (+20556)      |
| RLTR1D-chr7-5   | Crebzf (-1957)                          |
| RLTR1D-chr7-6   | Trim12a (-6461), 9230105E10Rik (+31402) |
| RLTR6_Mm-chr7-7 | Olfr651 (-39278), Trim30d (-5757)       |
| RLTR1C-chr7-1   | 2310008H09Rik (-6862), Gprc5b (+132351) |
| RLTR1D-chr7-7   | Acsm2 (-16571), Acsm5 (+18872)          |
| RLTR1D-chr7-8   | Shank2 (-297940), Dhcr7 (+54413)        |
| RLTR6_Mm-chr8-1 | Xkr5 (-19874), Defb40 (+7269)           |
| RLTR1D-chr8-1   | Zfp703 (-796580), Thap1 (+22587)        |
| RLTR6_Mm-chr8-2 | Gtf2e2 (-67168), Gsr (+11508)           |
| RLTR1D-chr8-2   | Ppp1r3b (-404866), Tnks (-5185)         |
| RLTR6_Mm-chr8-3 | Tusc3 (+209939), Msr1 (+449172)         |
| RLTR1D-chr8-3   | Msr1 (-430699), Fgf20 (+213576)         |
| RLTR1D-chr8-4   | Inpp4b (+177126), Il15 (+510218)        |
| RLTR1D-chr8-5   | Ucp1 (+16128), Elmod2 (+26010)          |
| RLTR1D-chr8-6   | 1700008F21Rik (+48012)                  |
| RLTR1D-chr8-7   | 1700008F21Rik (+49997)                  |
| RLTR1D-chr9-1   | Ddi1 (-126775), Dync2h1 (+783908)       |
| RLTR1C-chr9-1   | Ddi1 (-471530), Dync2h1 (+439153)       |
| RLTR1D-chr9-2   | Pgr (-125891), Trpc6 (+229800)          |
| RLTR1D-chr9-3   | Eepd1 (+207169)                         |
| RLTR1D-chr9-4   | Tbcel (-306457), Grik4 (+165688)        |
| RLTR6_Mm-chr9-1 | Grik4 (-47120), Arhgef12 (+114227)      |
| RLTR1D-chr9-5   | Commd4 (-41376), Trcg1 (-36881)         |
| RLTR6_Mm-chr9-2 | Impg1 (-104826)                         |

|                 |                                               |
|-----------------|-----------------------------------------------|
| RLTR1C-chr9-2   | Ctsh (-68232), Rasgrf1 (+76260)               |
| RLTR1D-chr9-6   | Plscr1 (-5724), Zic4 (+875498)                |
| RLTR1C-chr9-3   | Trf (-22242), 1300017J02Rik<br>(+35769)       |
| RLTR1D-chr9-7   | Fbxw21 (+12278), Plxnb1<br>(+54308)           |
| RLTR1D-chrX-1   | Mycs (-163032), Gm14374 (-<br>36770)          |
| RLTR1D-chrX-2   | Tspan7 (-188687), Otc (+44070)                |
| RLTR1D-chrX-3   | Dusp21 (-319406), Fundc1 (-<br>254167)        |
| RLTR1D-chrX-4   | 1700023I07Rik (-450159),<br>Slc6a14 (+296537) |
| RLTR6_Mm-chrX-1 | Gm4987 (+7740), Actrt1<br>(+119599)           |
| RLTR6_Mm-chrX-2 | Gm6760 (+391871)                              |
| RLTR1D-chrX-5   | Msn (-117689), Las1l (-21397)                 |
| RLTR6_Mm-chrX-3 | Fgf16 (-338091), Magee1<br>(+305990)          |
| RLTR1D-chrX-6   | Nap1l3 (+219823)                              |
| RLTR6_Mm-chrX-4 | Vmn2r121 (-149986)                            |
| RLTR1D-chrX-7   | 4921511C20Rik (+11824)                        |
| RLTR1D-chrX-8   | 2900062L11Rik (-21506), Bhlhb9<br>(+86463)    |
| RLTR1D-chrX-9   | Kir3dl1 (-28212), Kir3dl2 (-20691)            |
| RLTR1C-chrX-1   | Hsd17b10 (-17728), Huwe1<br>(+180886)         |
| RLTR1D-chrY-1   | Rbmy1a1 (+254707)                             |

---
