# Supplementary material for: Genomic analysis of mouse VL30 retrotransposons
Source: PubMed Central journal article supplement (PMC4859993; doi:10.1186/s13100-016-0066-8), 2016-05-06
Supplement: 13100_2016_66_MOESM6_ESM.pdf [file 13100_2016_66_MOESM6_ESM.pdf]

| <b>Gene Name</b>     | <b>VL30 Name/Distance to TSS</b>                                                                                                                                             |
|----------------------|------------------------------------------------------------------------------------------------------------------------------------------------------------------------------|
| <b>5730507C01Rik</b> | 12qA1-2-2 (-641417), RLTR1C-chr12-1 (-429395), RLTR1C-chr12-2 (+182737), RLTR6_Mm-chr12-1 (+280393), RLTR1C-chr12-3 (+281906), RLTR6_Mm-chr12-2 (+307502), 12qA1-2 (+604420) |
| <b>AK078446</b>      | 2qH4 (-47223)                                                                                                                                                                |
| <b>Gm10324</b>       | 13qB3-2 (+271944)                                                                                                                                                            |
| <b>Gm13051</b>       | 4qE1 (-45787)                                                                                                                                                                |
| <b>Gm13235</b>       | 4qE1-2 (-32771)                                                                                                                                                              |
| <b>Gm14420</b>       | 2qH4 (-211075)                                                                                                                                                               |
| <b>Gm3604</b>        | 13qB3-7 (+88879)                                                                                                                                                             |
| <b>Gm4983</b>        | RLTR6_Mm-chr12-3 (-259744), RLTR1C-chr12-7 (-51824), 12qA1-3 (+14194)                                                                                                        |
| <b>Prdm9</b>         | RLTR6_Mm-chr17-1 (-29625)                                                                                                                                                    |
| <b>RP23-282C23.3</b> | 4qE1 (+52398)                                                                                                                                                                |
| <b>Zfp229</b>        | RLTR6_Mm-chr17-5 (+41122)                                                                                                                                                    |
| <b>Zfp51</b>         | 17qA32tr (+25812)                                                                                                                                                            |
| <b>Zfp53</b>         | 17qA32tr (-12824)                                                                                                                                                            |
| <b>Zfp568</b>        | RLTR6_Mm-chr7-2 (-4304)                                                                                                                                                      |
| <b>Zfp599</b>        | 9qA3tr (+31810)                                                                                                                                                              |
| <b>Zfp600</b>        | 4qE1-2 (+189055)                                                                                                                                                             |
| <b>Zfp746</b>        | 6qB23tr (-148229)                                                                                                                                                            |
| <b>Zfp791</b>        | 8qC3 (-16620)                                                                                                                                                                |
| <b>Zfp808</b>        | 13qB3tr (-42041), 13qB3-7 (+164405)                                                                                                                                          |
| <b>Zfp809</b>        | 9qA3tr (+2382)                                                                                                                                                               |
| <b>Zfp820</b>        | RLTR6_Mm-chr17-5 (+70913)                                                                                                                                                    |
